# Supplementary material for: Integrative Transcriptome Analysis of mRNA and miRNA in Pepper’s Response to Phytophthora capsici Infection
Source: MDPI journal article supplement (doi:10.3390/biology13030186), 2024-03-14
Supplement: s1 [file s1]

**Table S1** Primers used in this study.

| Gene                                                                       | Forward primers (5'→3')   | Reverse primers(5'→3')   |
|----------------------------------------------------------------------------|---------------------------|--------------------------|
| Primers used for qRT-PCR verification of miRNAs' expression patterns       |                           |                          |
| STPK                                                                       | GGTTGGGAACAGAGACAGGA      | CTCCAGGTACTTGAGGTGGA     |
| UN                                                                         | TTTGCGCTTGAGACTAGGGA      | GGAGACATACTGGCTTCCCA     |
| RLP12                                                                      | TCGTGGAGATACATATTACAAAGAT | TCAGCACATGAAGTGCAATGA    |
| GRAS1                                                                      | TTCAACGTCATGGTCACTGC      | CGGTCACAACCTCTGTCAAC     |
| GRAS2                                                                      | CCAGGCCGAATGTGTTGTTA      | TCCAAGTAGCAGCTGACAGG     |
| FAR                                                                        | AGGTATGCAAGTGAAGAGGAGA    | CCTTCACAAGTCCATCCATGC    |
| SAT                                                                        | AAGTTACCATCATTATCAAGGG    | CTTCAATAGGAATGTGTACCAA   |
| CaActin                                                                    | AGGGATGGGTCAAAAGGATGC     | GAGACAACACCGCCTGAATAGC   |
| Primers used for qRT-PCR verification of target genes' expression patterns |                           |                          |
| miR166                                                                     | GCGCGAGAATGTTGTCTGGT      | Universal-qPCR 3' primer |
| miR530                                                                     | GCGTGCAATTGCACCTGC        | Universal-qPCR 3' primer |
| miRN2                                                                      | CGCGTGGTATTGTTCCGTT       | Universal-qPCR 3' primer |
| miR171                                                                     | CGTGATTGAGCCGTGCC         | Universal-qPCR 3' primer |
| miR395                                                                     | GCGCTGAAGTGTGTTGGGG       | Universal-qPCR 3' primer |
| U6                                                                         | GATTTGTGCGTGTCATCCTT      | GGGGACATCCGATAAAATTGG    |

**Table S2 mRNA-seq libraries of pepper samples infected with *P. capsici***

| Sample  | Clean reads | Clean bases (G) | Q20(%) | Q30(%) | GC(%) |
|---------|-------------|-----------------|--------|--------|-------|
| CM0h-1  | 78188400    | 10.76           | 98.74  | 95.11  | 44.74 |
| CM0h-2  | 83988478    | 11.47           | 98.54  | 94.52  | 43.83 |
| CM0h-3  | 77619568    | 10.57           | 98.53  | 94.49  | 43.48 |
| CM6h-1  | 90176120    | 12.39           | 98.25  | 94.25  | 43.23 |
| CM6h-2  | 72146742    | 9.92            | 98.65  | 94.88  | 43.79 |
| CM6h-3  | 86090580    | 11.83           | 98.64  | 94.84  | 43.47 |
| CM24h-1 | 72686490    | 9.41            | 97.43  | 92.58  | 42.97 |
| CM24h-2 | 73167344    | 9.76            | 97.87  | 93.52  | 43.42 |
| CM24h-3 | 102243124   | 13.63           | 97.96  | 93.63  | 43.39 |
| CM48h-1 | 96355956    | 12.91           | 98.14  | 94.05  | 43.00 |
| CM48h-2 | 74280766    | 9.92            | 97.99  | 93.68  | 43.19 |
| CM48h-3 | 66453164    | 9.00            | 97.96  | 93.90  | 43.27 |
| EC0h-1  | 76148726    | 10.41           | 98.62  | 94.78  | 43.81 |
| EC0h-2  | 73300914    | 9.94            | 98.38  | 94.07  | 43.46 |
| EC0h-3  | 87320894    | 11.89           | 98.50  | 94.40  | 43.56 |
| EC6h-1  | 91135202    | 12.47           | 98.60  | 94.72  | 43.67 |
| EC6h-2  | 72283878    | 10.05           | 98.88  | 95.40  | 43.13 |
| EC6h-3  | 68945514    | 9.61            | 98.94  | 95.57  | 43.72 |
| EC24h-1 | 102039510   | 14.53           | 97.90  | 94.15  | 42.97 |
| EC24h-2 | 102660800   | 13.62           | 97.77  | 93.14  | 42.65 |
| EC24h-3 | 106700378   | 14.18           | 98.00  | 93.64  | 43.08 |
| EC48h-1 | 66831516    | 9.00            | 96.28  | 89.70  | 42.95 |
| EC48h-2 | 76507054    | 10.01           | 97.59  | 92.72  | 42.92 |
| EC48h-3 | 72367592    | 9.76            | 98.02  | 93.84  | 42.65 |

Note: CM represents the resistant pepper line CM334, EC represents the susceptible pepper line EC01; 0 h, 6 h, 24 h and 48 h represent the four inoculation time points; 1, 2 and 3 represent three independent biological replicates.

**Table S3 Small RNA-seq libraries of pepper samples infected with *P. capsici***

| Sample  | Clean reads | Clean bases | Q20      | Q30      | GC       |
|---------|-------------|-------------|----------|----------|----------|
| CM0h-1  | 12146806    | 276515956   | 0.995471 | 0.985914 | 0.497295 |
| CM0h-2  | 14682624    | 338146850   | 0.995796 | 0.987363 | 0.482447 |
| CM0h-3  | 11764775    | 261805216   | 0.99536  | 0.984992 | 0.498851 |
| CM6h-1  | 11584353    | 262161712   | 0.99545  | 0.985842 | 0.521355 |
| CM6h-2  | 10789385    | 249561823   | 0.994554 | 0.98287  | 0.527683 |
| CM6h-3  | 11144817    | 256795311   | 0.995563 | 0.986643 | 0.522855 |
| CM24h-1 | 12381027    | 274606996   | 0.995651 | 0.986476 | 0.508253 |
| CM24h-2 | 13863230    | 325028602   | 0.99574  | 0.986642 | 0.502204 |
| CM24h-3 | 14126060    | 338536648   | 0.995427 | 0.985786 | 0.507608 |
| CM48h-1 | 11969219    | 282999989   | 0.995181 | 0.984612 | 0.49504  |
| CM48h-2 | 13450691    | 314046266   | 0.995024 | 0.984261 | 0.500074 |
| CM48h-3 | 11623623    | 274008898   | 0.994303 | 0.982685 | 0.492085 |
| EC0h-1  | 12175021    | 285054384   | 0.995307 | 0.98512  | 0.488715 |
| EC0h-2  | 10216739    | 229064792   | 0.995221 | 0.985036 | 0.496961 |
| EC0h-3  | 9972533     | 218831100   | 0.995129 | 0.984569 | 0.514259 |
| EC6h-1  | 7766172     | 170519399   | 0.994927 | 0.984413 | 0.522695 |
| EC6h-2  | 9662260     | 217640236   | 0.995273 | 0.985149 | 0.500806 |
| EC6h-3  | 8442852     | 183894064   | 0.994417 | 0.994417 | 0.53662  |
| EC24h-1 | 5978561     | 131309431   | 0.995478 | 0.985886 | 0.530819 |
| EC24h-2 | 5486461     | 116961471   | 0.995171 | 0.985107 | 0.539875 |
| EC24h-3 | 5015176     | 106585619   | 0.995464 | 0.995464 | 0.538274 |
| EC48h-1 | 9171606     | 203779988   | 0.995314 | 0.985435 | 0.526667 |
| EC48h-2 | 8195853     | 186716518   | 0.995526 | 0.985938 | 0.53002  |
| EC48h-3 | 6845811     | 157969089   | 0.995376 | 0.98551  | 0.526416 |

Note: CM represents the resistant pepper line CM334, EC represents the susceptible pepper line EC01; 0 h, 6 h, 24 h and 48 h represent the four inoculation time points; 1, 2 and 3 represent three independent biological replicates.

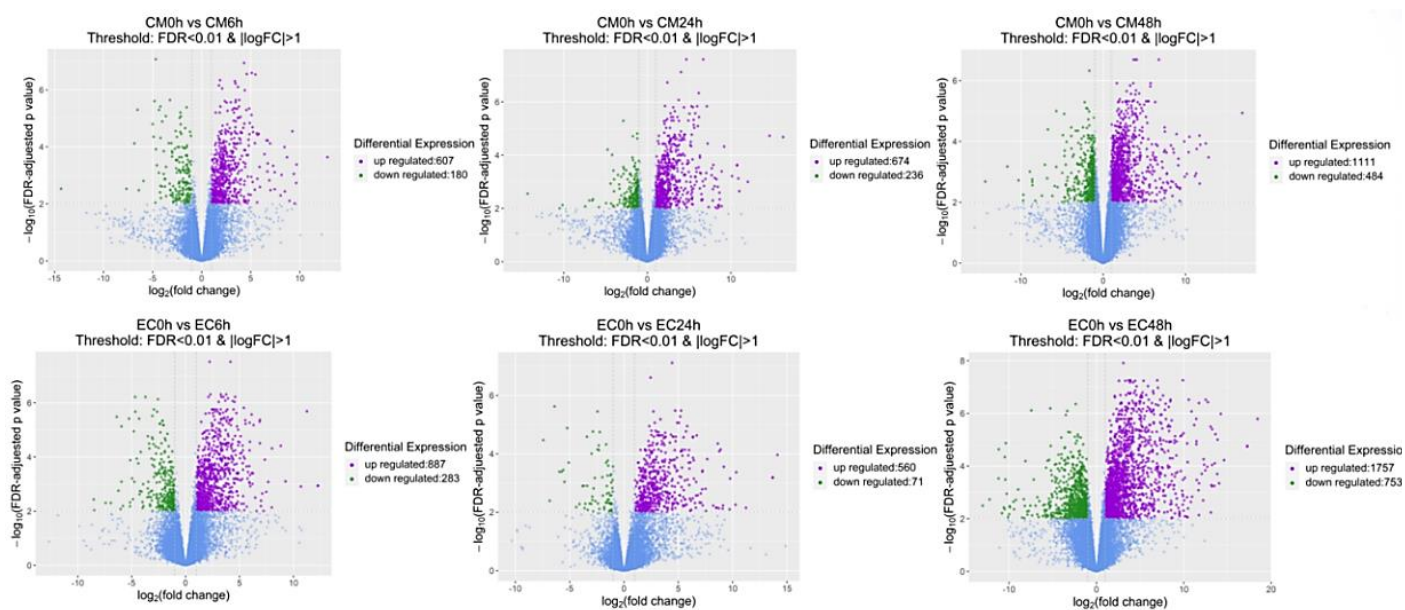

**Figure S1 Volcano plots of differentially expressed genes (DEGs) in pepper's response to *P. capsici* infection**

The purple dots are significantly up-regulated genes, the green dots are significantly down-regulated genes, and the blue dots are genes without significant changes.

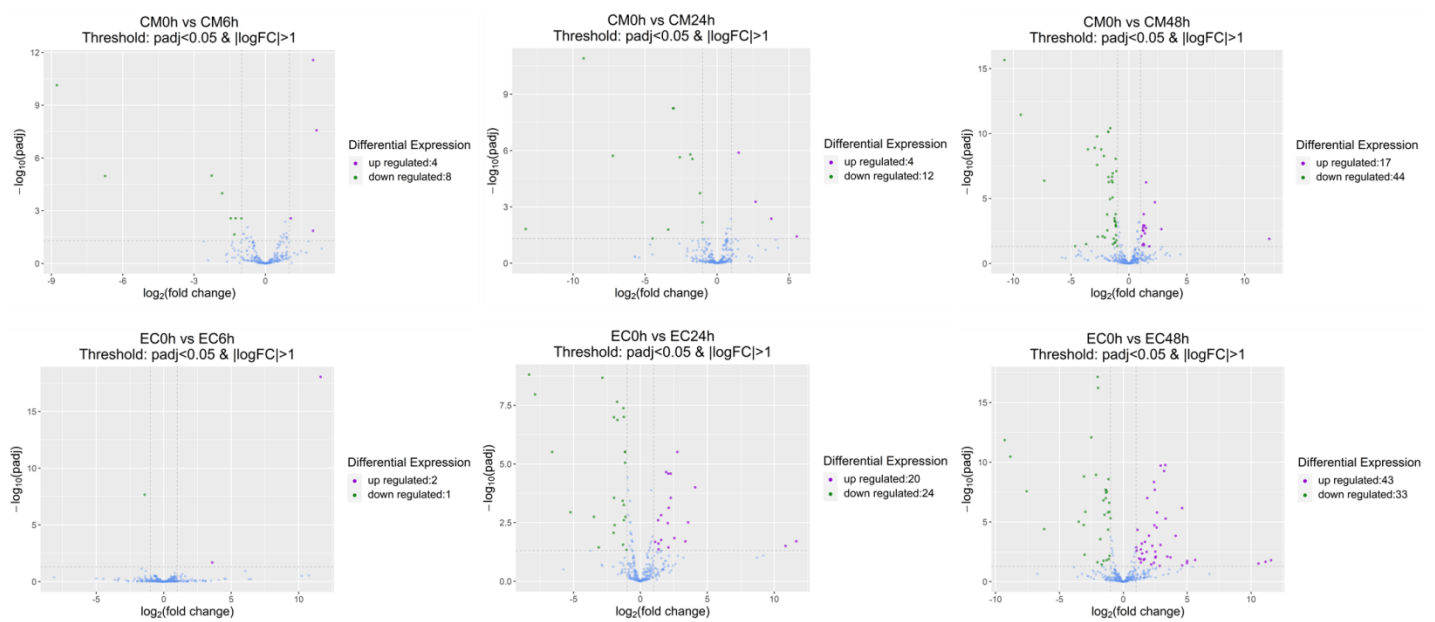

**Figure S2 Volcano plots of differentially expressed miRNAs (DEMs) in pepper's response to *P. capsici* infection**

The purple dots are significantly up-regulated DEMs, the green dots are significantly down-regulated DEMs, and the blue dots are DEMs without significant changes.
